# Supplementary material
Source: PubMed Central journal article supplement (PMC10528687)

**Supplementary Figure S6- Histology of baseline human tumors.** Representative images of H&E, ER, PR, and HER2 IHC staining of human tumor specimens (analyzed in Fig. 3A) obtained prior to E2 treatment are shown.

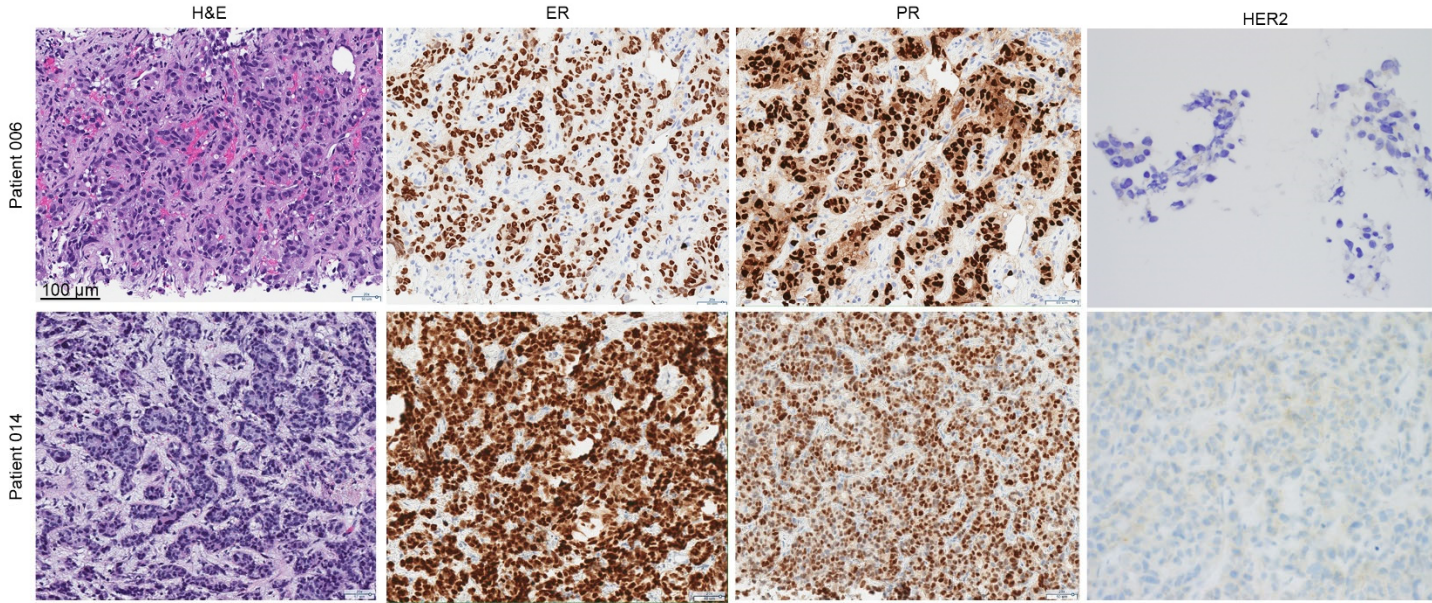

Supplement: NIHMS1918505-supplement-6.pdf [file NIHMS1918505-supplement-6.pdf]
