# Supplementary material
Source: PubMed Central journal article supplement (PMC10528687)

**Supplementary Figure S12- ER overexpression promotes E2-induced R-loop formation. (A/B)**

T47D/pInd20-*ESR1* cells were pretreated with HD x 7 d, and then treated with HD + dox x 14 d prior to seeding. Both cell lines were then treated as indicated x 24 h, fixed, and stained for DNA/RNA hybrids (S9.6 antibody) and with DAPI. S9.6 fluorescence intensity was quantified in  $\geq 100$  nuclei per group. (C) Cells were transiently transfected with plasmids encoding RNase H1 or vector control. Two days later, cells were treated  $\pm$  1 nM E2 x 24 h, then fixed, stained, and analyzed as in (B). Representative images are shown. \* $p < 0.05$ , \*\* $p < 0.005$ , \*\*\* $p < 0.0005$ , \*\*\*\* $p < 0.0001$  compared to control unless otherwise indicated.

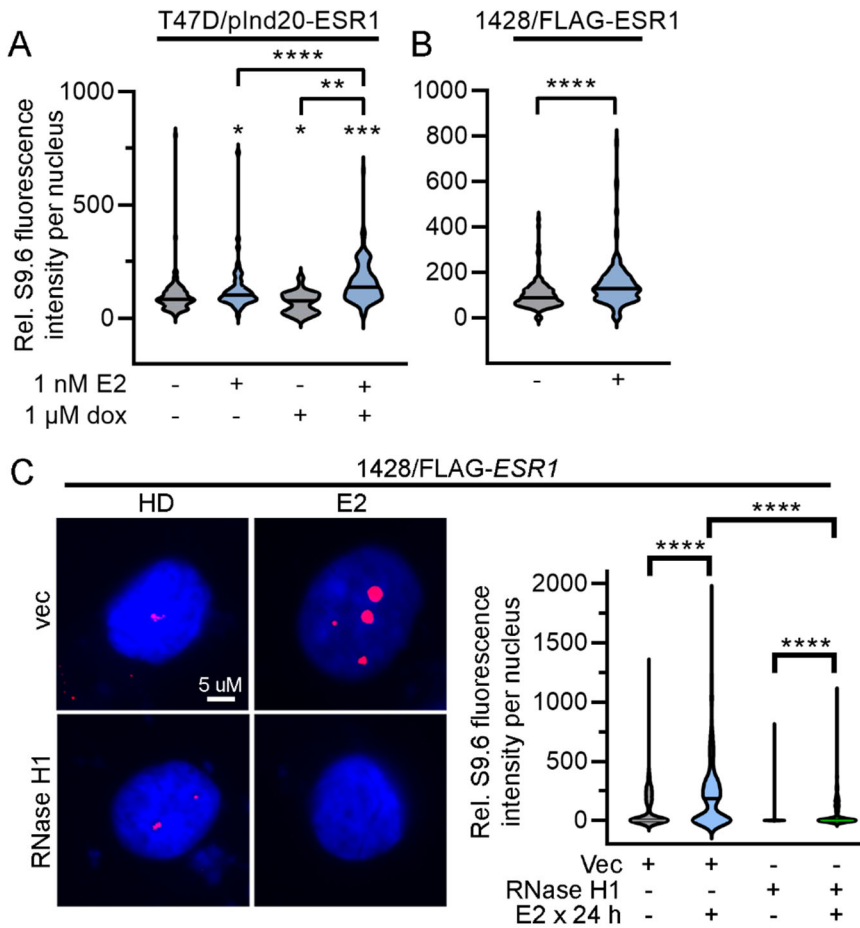

Supplement: NIHMS1918505-supplement-12.pdf [file NIHMS1918505-supplement-12.pdf]
