# Supplementary material
Source: PubMed Central journal article supplement (PMC10528687)

**Supplementary Figure S13- E2 and olaparib combine to increase R-loop formation.** Cells were treated  $\pm$  olaparib for 2 d, then treated  $\pm$  olaparib  $\pm$  E2 x 24 h. Cells were fixed and stained for DNA:RNA hybrids (S9.6 antibody) and with DAPI. S9.6 fluorescence intensity was quantified in  $\geq 100$  nuclei/group. \* $p < 0.05$ , \*\*\*\* $p < 0.0001$ .

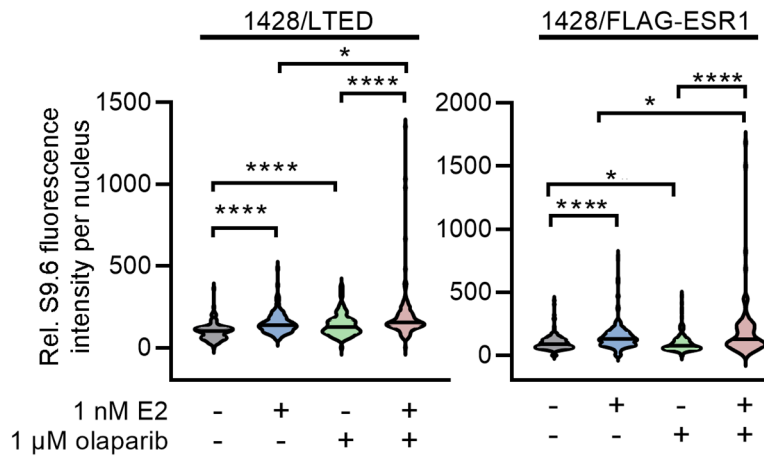

Supplement: NIHMS1918505-supplement-13.pdf [file NIHMS1918505-supplement-13.pdf]
