# Supplementary material
Source: PubMed Central journal article supplement (PMC10528687)

**Supplementary Figure S14- Individual growth curves of tumors from mice treated ± E2 and/or olaparib.** OvX NSG mice bearing tumors ~200 mm<sup>3</sup> were randomized to treatment with vehicle, olaparib (50 mg/kg/d i.p.), E2 (1 mg s.c. pellet, replaced every 30 d), or the combination of E2 and olaparib. E2 was administered continuously. Olaparib was administered daily for 28 d, then stopped. Tumor volumes were serially measured. Each line represents one mouse. Summary data are shown in Fig. 6A/B.

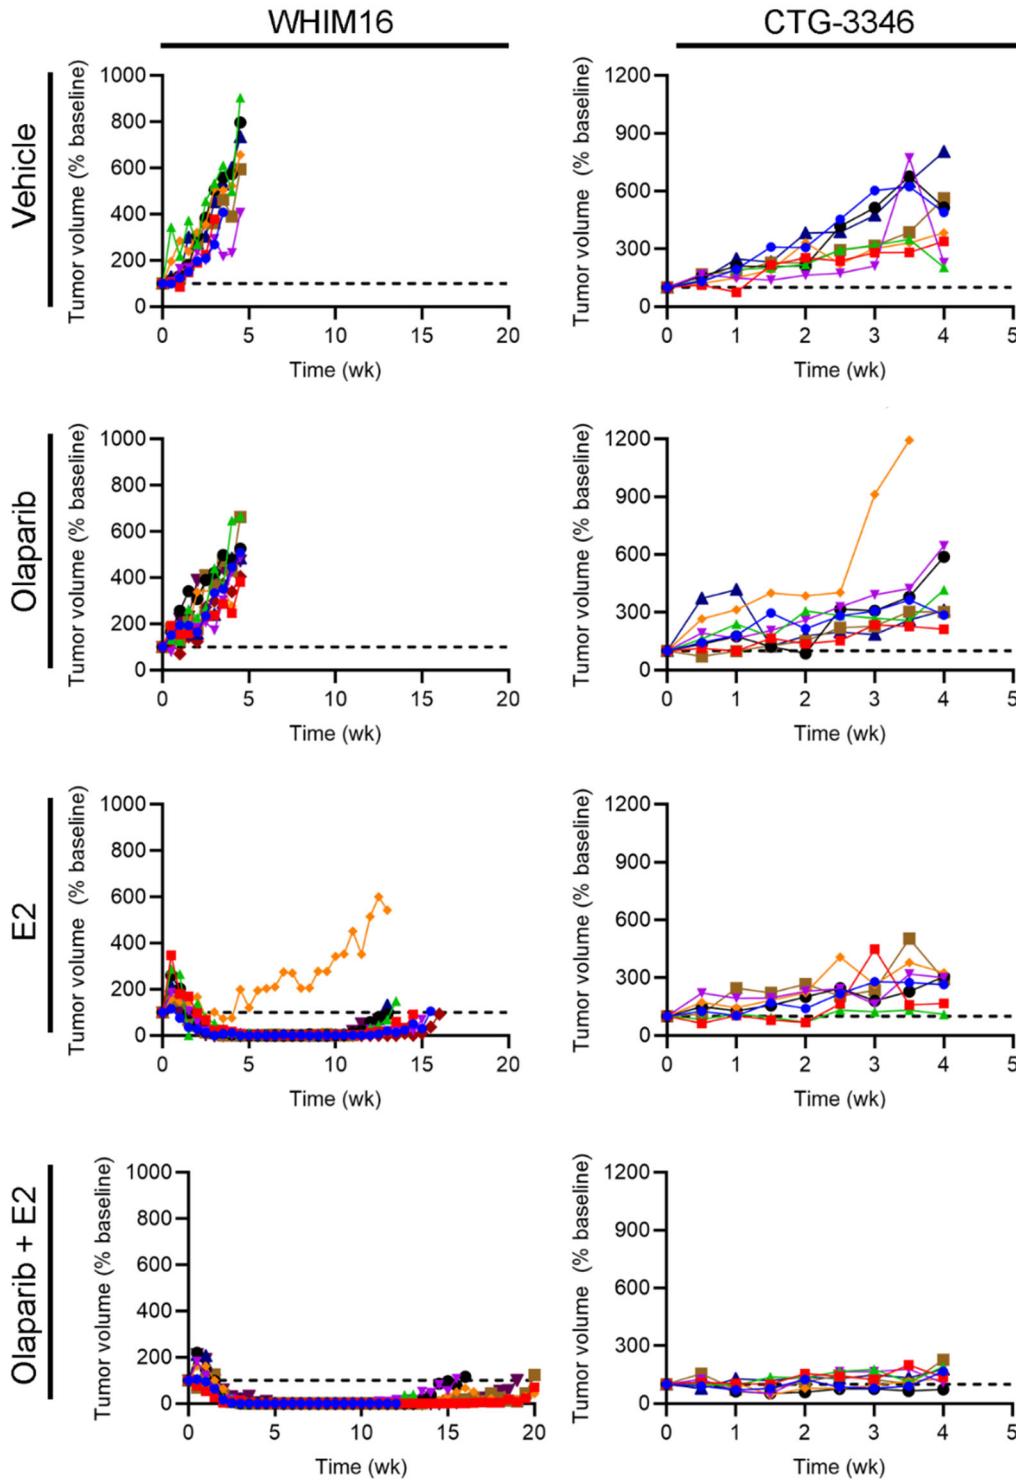

Supplement: NIHMS1918505-supplement-14.pdf [file NIHMS1918505-supplement-14.pdf]
